# Supplementary material for: Calcium Ion Induced Structural Changes Promote Dimerization of Secretagogin, Which Is Required for Its Insulin Secretory Function
Source: PubMed Central journal article supplement (PMC5539292; doi:10.1038/s41598-017-07072-4), 2017-08-01
Supplement: 41598_2017_7072_MOESM1_ESM.pdf [file 41598_2017_7072_MOESM1_ESM.pdf]

## Supplementary Information

### Calcium Ion Induced Structural Changes Promote Dimerization of Secretagogin, Which Is Required for Its Insulin Secretory Function

Jae-Jin Lee<sup>1\*</sup>, Seo-Yun Yang<sup>1\*</sup>, Jimin Park<sup>1</sup>, James E. Ferrell, Jr<sup>2</sup>, Dong-Hae Shin<sup>1</sup> and Kong-Joo Lee<sup>1†</sup>

<sup>1</sup>Graduate School of Pharmaceutical Sciences, College of Pharmacy, Ewha Womans University,  
Seoul, Korea 120-750

<sup>2</sup>Department of Chemical and Systems Biology, Stanford University School of Medicine, Stanford,  
CA 94305-5174, USA

\*These authors contributed equally to this work

†Address for correspondence: Kong-Joo Lee, Tel: +82-2-3277-3038, Fax: +82-2-3277-3760, e-mail:

[kjl@ewha.ac.kr](mailto:kjl@ewha.ac.kr)

## Supplementary Figure legends

### Supplementary Figure 1 – SCGN is readily dimerized with disulfide linkage following calcium binding.

(A) Recombinant SCGN was incubated with indicated  $\text{CaCl}_2$  concentration at R.T. for 15 min followed by 0.1 mM  $\text{H}_2\text{O}_2$  treatment at  $37^\circ\text{C}$  for 1 h. Data are presented as mean  $\pm$  SD of three experiments ( $*P < 0.05$ , Student's t-test). (B) Size exclusion chromatograms of SCGN protein in response to calcium and  $\text{H}_2\text{O}_2$  treatments. SCGN protein treated with 0, 2 mM  $\text{CaCl}_2$  for 15 min at room temperature followed by incubation with 0, 1 mM  $\text{H}_2\text{O}_2$  for 1 h at  $37^\circ\text{C}$ . Apo- SCGN without  $\text{H}_2\text{O}_2$  (black dotted line),  $\text{Ca}^{2+}$ -bound SCGN (2 mM  $\text{CaCl}_2$ ) without  $\text{H}_2\text{O}_2$  (red dotted line), Apo- SCGN treated with 1 mM  $\text{H}_2\text{O}_2$  (black line),  $\text{Ca}^{2+}$ -bound SCGN with 1 mM  $\text{H}_2\text{O}_2$  (red line). Albumin (66.4 kDa) and  $\alpha$ -lactalbumin (14.2 kDa) were used as molecular weight markers. (C) Endogenous SCGN levels were detected in lung fibroblast WI38, cervical cancer cell line HeLa, lung cancer cell line, H358, H157, human embryonic kidney cell line HEK 293T, and mouse insulinoma cell line, NIT-1. The cell lysates were separated on reducing and reducing SDS-PAGE and SCGN was detected by WB. GAPDH was detected for loading control. Non-specific bands were indicated as \* (D) SCGN forms dimers and oligomers in HeLa cells in response to  $\text{H}_2\text{O}_2$ . HeLa cells overexpressing SCGN were treated with the indicated  $\text{H}_2\text{O}_2$  concentration for indicated times. The cell lysates were separated on non-reducing and reducing SDS-PAGE and SCGN was detected by WB. Tubulin was detected for loading control. (E) HeLa cells overexpressing SCGN were treated with the indicated  $\text{H}_2\text{O}_2$  and ionomycin concentration for 30 min. Proteins were separated under non-reducing and reducing conditions on SDS-PAGE and SCGN n and tubulin were detected with western analysis.

### Supplementary Figure 2 - Calcium bound SCGN forms stable dimers through C193-C193 disulfide linkage.

(A) Recombinant SCGN was incubated with 0 or 2 mM CaCl<sub>2</sub> at R.T. for 15 min followed by 1 mM H<sub>2</sub>O<sub>2</sub> treatment for 1 h. Proteins were separated by non-reducing SDS-PAGE, and each protein bands were analyzed by peptide sequencing with nanoUPLC-ESI-Q-TOF using the DBond disulfide searching algorithm. (B) List of identified disulfide linkages of each SCGN band. (C) Tandem mass spectra of C193-C269, and C253-C269 disulfide linked peptide.

**Supplementary Figure 3 - SCGN forms stable dimers via C193-C193 disulfide linkage and has a reactive cysteine readily oxidized by H<sub>2</sub>O<sub>2</sub>.**

(A) Conservation map of cysteine residues in SCGN was obtained from the orthologs present in all of the animal species for which KEGG has complete genomes. Orthologies were manually checked if it is ambiguous. (B) SCGN WT, and Cys mutant (C193S, C253S, C269S) proteins were incubated with/without CaCl<sub>2</sub> at R.T. for 15 min followed by H<sub>2</sub>O<sub>2</sub> treatment in indicated concentration at 37°C for 1 h. Proteins were separated by non-reducing and reducing SDS-PAGE. (C) Recombinant SCGN was incubated in indicated concentration at 37°C for 1 h. Proteins were incubated with 1 mM NPSB-B at R.T. for 2 h for labeling the reactive Cys residue, followed by separation on reducing SDS-PAGE and detection by streptavidin-HRP. Coomassie staining gel showing amount of gel loaded proteins.

**Supplementary Figure 4 - Results of MD simulations.**

(A) The RMSDs of backbone C $\alpha$  atoms during the simulations for apo- SCGN (green) and Ca<sup>2+</sup>-bound SCGN (magenta). (B) The dimeric Ca<sup>2+</sup>-bound SCGN constructed with coordinates at 35 ns using HEX 6.3.

**Supplementary Figure 5- Cellular localization of SCGN monomer, dimer, and oligomers**

Subcellular fractionation of HeLa cells overexpressing SCGN WT, and Cys mutants (C193S, C253S, C269S) was performed and each fraction was separated on non-reducing and reducing SDS PAGE

and hSCGN was detected by Western analysis. PRDX6, lamin B, and flotillin, were used as markers for cytosol and nucleus, and membrane respectively.

**Supplementary Figure 6 - Full size gels used in Figure 1**

**Supplementary Figure 7 - Full size gels used in Figure 4**

**Supplementary Figure 8 - Full size gels used in Figure 5**

A

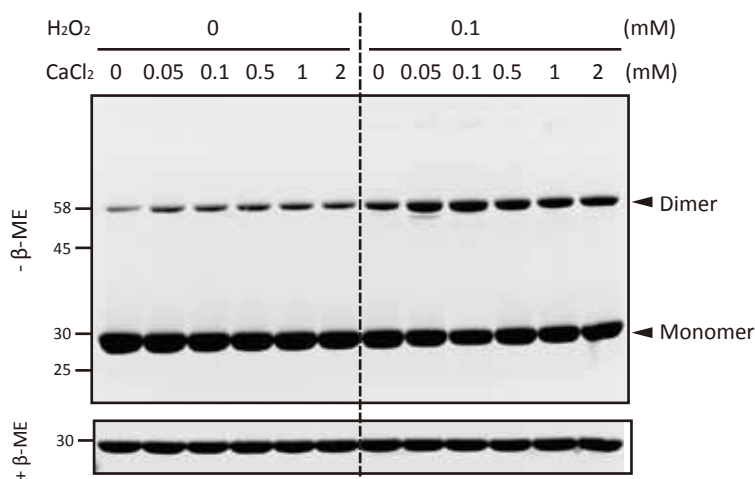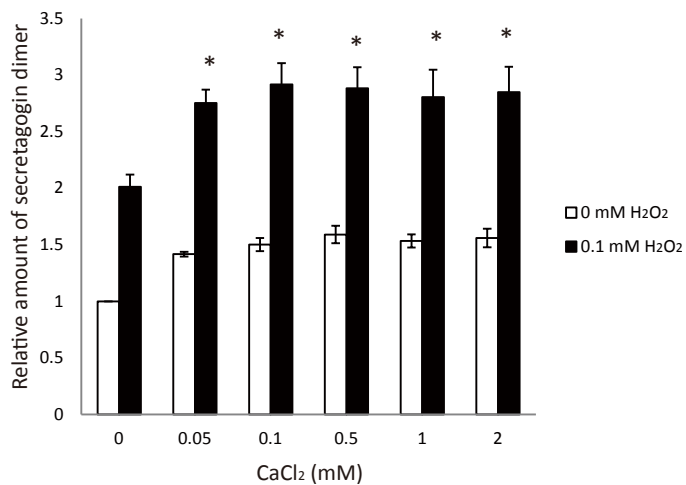

B

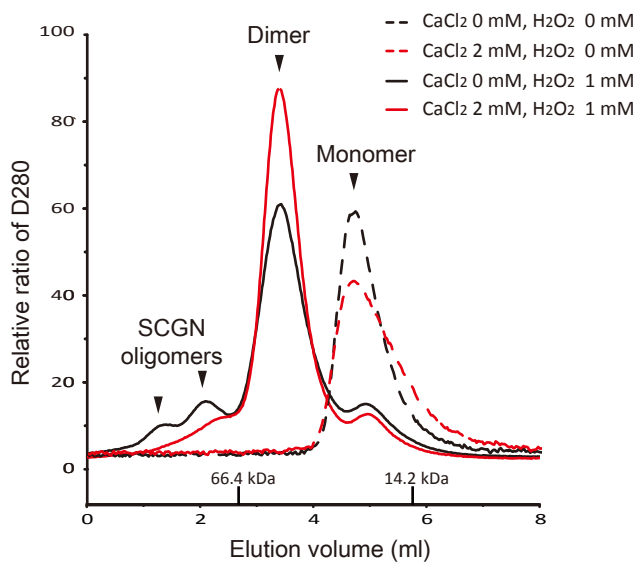

C

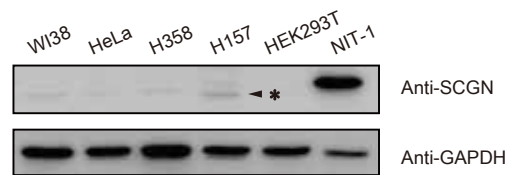

D

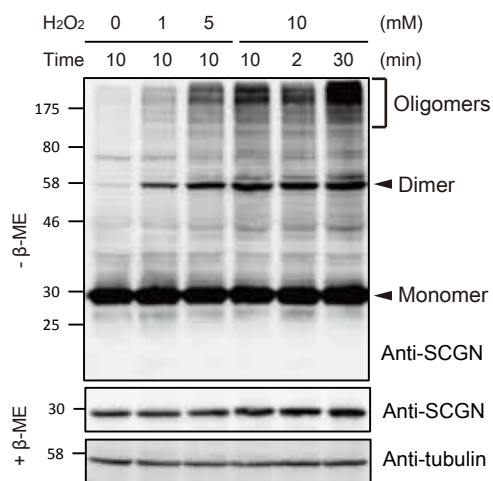

E

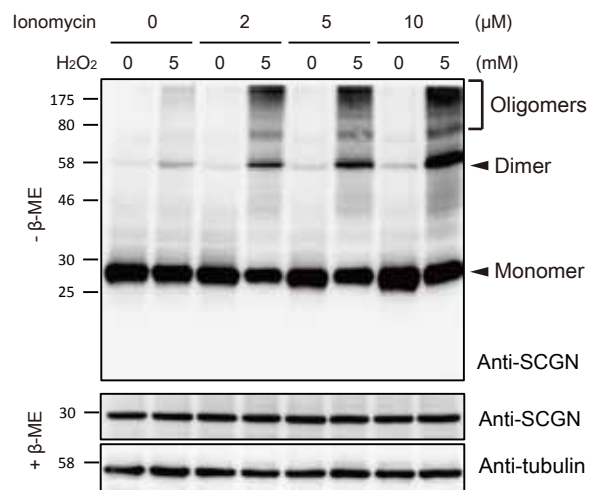

Figure S1

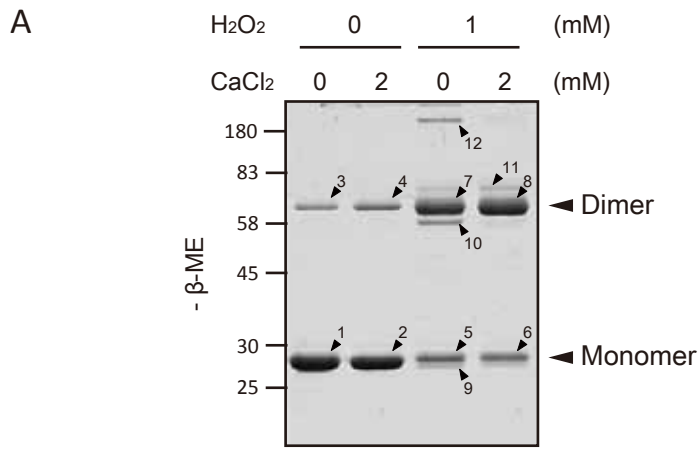

**B** List of identified disulfide linkages of each SCGN band

| Band No. | Description                   |                  | Disulfide linkage | Observed mw (CS) | Calculated mw | DeltaM    | Dbond Score |       |
|----------|-------------------------------|------------------|-------------------|------------------|---------------|-----------|-------------|-------|
|          | H <sub>2</sub> O <sub>2</sub> | Ca <sup>2+</sup> |                   |                  |               |           |             |       |
| 1        | Monomer                       | -                | -                 | No ID            |               |           |             |       |
| 2        |                               | -                | +                 | Cys253 - Cys269  | 586.9968(3+)  | 1757.8804 | 0.0882      | 33.9  |
| 3        | Dimer                         | -                | -                 | Cys253 - Cys269  | 586.9984(3+)  | 1757.8804 | 0.093       | 7.3   |
| 4        |                               | -                | +                 | Cys253 - Cys269  | 586.9981(3+)  | 1757.8804 | 0.0921      | 2.8   |
| 5        | Monomer                       | +                | -                 | No ID            |               |           |             |       |
| 6        |                               | +                | +                 | Cys253 - Cys269  | 586.9966(3+)  | 1757.8804 | 0.0876      | 36.4  |
| 7        | Dimer                         | +                | -                 | Cys193 - Cys193  | 520.6976(4+)  | 2078.7649 | -0.0036     | 159.3 |
| 8        |                               | +                | +                 | Cys193 - Cys193  | 520.6973(4+)  | 2078.7649 | -0.0048     | 223   |
| 9        | Lower shifted Monomer         | +                | -                 | Cys193 - Cys269  | 525.9949(4+)  | 2099.9537 | -0.0032     | 17.2  |
| 10       | Lower shifted Dimer           | +                | -                 | Cys193 - Cys269  | 525.9955(4+)  | 2099.9537 | -8.0E-4     | 45.6  |
| 11       | Upper shifted Dimer           | +                | +                 | Cys193 - Cys269  | 700.9935(3+)  | 2099.9537 | 0.005       | 7     |
|          |                               |                  |                   | Cys253 - Cys269  | 586.9656(3+)  | 1757.8804 | -0.0054     | 9.2   |
| 12       | Upper shifted Dimer           | -                | +                 | Cys193 - Cys269  | 700.9938(3+)  | 2099.9537 | 0.0059      | 18.9  |

**C**

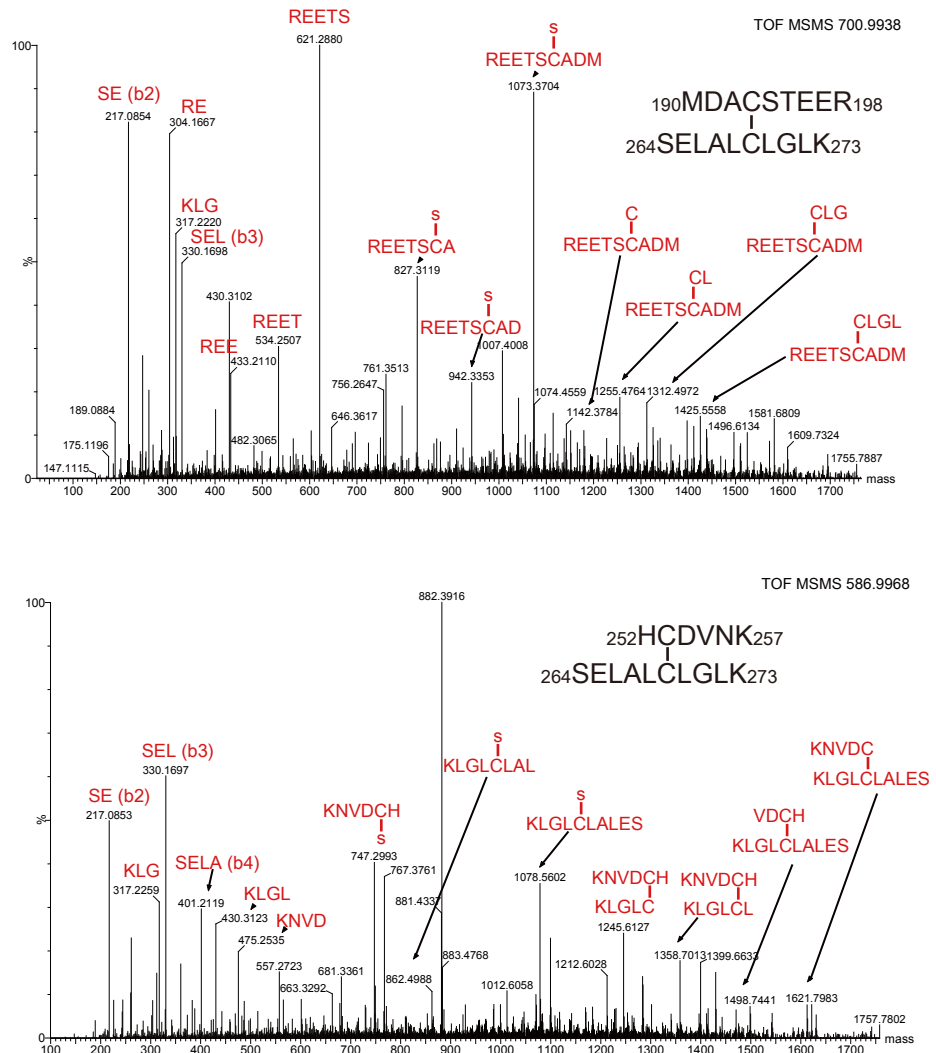

Figure S2

A

|                                    | Species                                                     | C193                                       | C253 | C269 |   |
|------------------------------------|-------------------------------------------------------------|--------------------------------------------|------|------|---|
| MAMMALS                            | Humans                                                      | C                                          | C    | C    |   |
|                                    | Pan troglodytes (chimpanzee)                                | C                                          | C    | C    |   |
|                                    | Pan paniscus (bonobo)                                       | C                                          | C    | C    |   |
|                                    | Gorilla gorilla gorilla (western lowland gorilla)           | C                                          | C    | C    |   |
|                                    | Pongo abelii (Sumatran orangutan)                           | C                                          | C    | C    |   |
|                                    | Nomascus leucogenys (northern white-cheeked gibbon)         | C                                          | C    | C    |   |
|                                    | Macaca mulatta (rhesus monkey)                              | C                                          | C    | C    |   |
|                                    | Macaca fascicularis (crab-eating macaque)                   | C                                          | C    | C    |   |
|                                    | Callithrix jacchus (white-tufted-ear marmoset)              | C                                          | C    | C    |   |
|                                    | Mus musculus (mouse)                                        | S                                          | C    | C    |   |
|                                    | Rattus norvegicus (rat)                                     | S                                          | C    | C    |   |
|                                    | Cricetulus griseus (Chinese hamster)                        | S                                          | C    | C    |   |
|                                    | Nannospalax galili (Upper Galilee mountains blind mole rat) | C                                          | C    | C    |   |
|                                    | Heterocephalus glaber (naked mole rat)                      | S                                          | C    | C    |   |
|                                    | Oryctolagus cuniculus (rabbit)                              | C                                          | C    | C    |   |
|                                    | Tupaia chinensis (Chinese tree shrew)                       | C                                          | C    | C    |   |
|                                    | Canis familiaris (dog)                                      | C                                          | C    | C    |   |
|                                    | Ailuropoda melanoleuca (giant panda)                        | C                                          | C    | C    |   |
|                                    | Ursus maritimus (polar bear)                                | C                                          | C    | C    |   |
|                                    | Felis catus (domestic cat)                                  | C                                          | C    | C    |   |
|                                    | Panthera tigris altaica (Amur tiger)                        | C                                          | C    | C    |   |
|                                    | Bos taurus (cow)                                            | C                                          | C    | C    |   |
|                                    | Bos mutus (wild yak)                                        | C                                          | C    | C    |   |
|                                    | Pantholops hodgsonii (chiru)                                | C                                          | C    | C    |   |
|                                    | Capra hircus (goat)                                         | C                                          | C    | C    |   |
|                                    | Ovis aries (sheep)                                          | C                                          | C    | C    |   |
|                                    | Sus scrofa (pig)                                            | C                                          | C    | C    |   |
|                                    | Camelus ferus (Wild Bactrian camel)                         | C                                          | C    | C    |   |
|                                    | Balaenoptera acutorostrata scammoni (minke whale)           | C                                          | C    | C    |   |
|                                    | Lipotes vexillifer (Yangtze River dolphin)                  | C                                          | C    | C    |   |
|                                    | Equus caballus (horse)                                      | C                                          | C    | C    |   |
|                                    | Myotis brandtii (Brandt's bat)                              | NG                                         | NG   | NG   |   |
|                                    | Myotis davidii                                              | NG                                         | NG   | NG   |   |
|                                    | Pteropus alecto (black flying fox)                          | C                                          | C    | C    |   |
|                                    | Monodelphis domestica (opossum)                             | C                                          | C    | C    |   |
|                                    | Sarcophilus harrisii (Tasmanian devil)                      | C                                          | C    | C    |   |
|                                    | Ornithorhynchus anatinus (platypus)                         | C                                          | C    | C    |   |
|                                    | BIRDS                                                       | Gallus gallus (chicken)                    | C    | C    | C |
|                                    |                                                             | Meleagris gallopavo (turkey)               | C    | C    | C |
|                                    |                                                             | Anas platyrhynchos (mallard)               | C    | C    | C |
|                                    |                                                             | Taeniopygia guttata (zebra finch)          | C    | C    | C |
|                                    |                                                             | Geospiza fortis (medium ground-finch)      | S    | C    | C |
|                                    |                                                             | Ficedula albicollis (collared flycatcher)  | C    | C    | C |
|                                    |                                                             | Pseudopodoces humilis (Tibetan ground-tit) | C    | C    | C |
|                                    |                                                             | Corvus cornix (hooded crow)                | C    | C    | C |
|                                    |                                                             | Falco peregrinus (peregrine falcon)        | C    | C    | C |
|                                    |                                                             | Falco cherrug (Saker falcon)               | C    | C    | C |
| Columba livia (rock pigeon)        |                                                             | C                                          | C    | C    |   |
| REPTILES                           | Alligator sinensis (Chinese alligator)                      | C                                          | C    | C    |   |
|                                    | Alligator mississippiensis (American alligator)             | C                                          | C    | C    |   |
|                                    | Pelodiscus sinensis (Chinese soft-shelled turtle)           | C                                          | C    | C    |   |
|                                    | Chelonia mydas (green sea turtle)                           | C                                          | C    | C    |   |
|                                    | Anolis carolinensis (green anole)                           | C                                          | C    | C    |   |
| Python bivittatus (Burmese python) | S                                                           | C                                          | C    |      |   |
| AMPHIBIANS                         | Xenopus laevis (African clawed frog)                        | S                                          | C    | C    |   |
|                                    | Xenopus tropicalis (western clawed frog)                    | S                                          | C    | C    |   |
| FISHES                             | Danio rerio (zebrafish)                                     | S                                          | C    | C    |   |
|                                    | Takifugu rubripes (torafugu)                                | C                                          | C    | C    |   |
|                                    | Maylandia zebra (zebra mbuna)                               | C                                          | C    | C    |   |
|                                    | Oryzias latipes (Japanese medaka)                           | C                                          | C    | C    |   |
|                                    | Xiphophorus maculatus (southern platyfish)                  | C                                          | C    | C    |   |
|                                    | Latimeria chalumnae (coelacanth)                            | C                                          | C    | C    |   |
| CARTILAGINOUS FISHES               | Callorhynchus milii (elephant shark)                        | C                                          | C    | C    |   |
| LANCELETS                          | Branchiostoma floridae (Florida lancelet)                   | K                                          | V    | C    |   |
| ASCIDIANS                          | Ciona intestinalis (sea squirt)                             | G                                          | C    | C    |   |
| ECHINODERMS                        | Strongylocentrotus purpuratus (purple sea urchin)           | M                                          | F    | C    |   |

  

|                                               | Species                                          | C193 | C253 | C269 |
|-----------------------------------------------|--------------------------------------------------|------|------|------|
| INSECTS                                       | Drosophila melanogaster (fruit fly)              | NG   | NG   | NG   |
|                                               | Drosophila pseudoobscura pseudoobscura           | NG   | NG   | NG   |
|                                               | Drosophila ananassae                             | NG   | NG   | NG   |
|                                               | Drosophila erecta                                | NG   | NG   | NG   |
|                                               | Drosophila persimilis                            | NG   | NG   | NG   |
|                                               | Drosophila sechellia                             | NG   | NG   | NG   |
|                                               | Drosophila simulans                              | NG   | NG   | NG   |
|                                               | Drosophila willistoni                            | NG   | NG   | NG   |
|                                               | Drosophila yakuba                                | NG   | NG   | NG   |
|                                               | Drosophila grimshawi                             | NG   | NG   | NG   |
|                                               | Drosophila mojavensis                            | NG   | NG   | NG   |
|                                               | Drosophila virilis                               | NG   | NG   | NG   |
|                                               | Musca domestica (house fly)                      | NG   | NG   | NG   |
|                                               | Anopheles gambiae (mosquito)                     | NG   | NG   | NG   |
|                                               | Aedes aegypti (yellow fever mosquito)            | NG   | NG   | NG   |
|                                               | Culex quinquefasciatus (southern house mosquito) | NG   | NG   | NG   |
|                                               | Apis mellifera (honey bee)                       | NG   | NG   | NG   |
|                                               | Solenopsis invicta (red fire ant)                | NG   | NG   | NG   |
|                                               | Acromyrmex echinator (Panamanian leafcutter ant) | NG   | NG   | NG   |
|                                               | Harpegnathos saltator (Jerdon's jumping ant)     | NG   | NG   | NG   |
| Camponotus floridanus (Florida carpenter ant) | NG                                               | NG   | NG   |      |
| Nasonia vitripennis (jewel wasp)              | NG                                               | NG   | NG   |      |
| Tribolium castaneum (red flour beetle)        | NG                                               | NG   | NG   |      |
| Bombyx mori (domestic silkworm)               | NG                                               | NG   | NG   |      |
| Plutella xylostella (diamondback moth)        | NG                                               | NG   | NG   |      |
| Acyrtosiphon pisum (pea aphid)                | NG                                               | NG   | NG   |      |
| Pediculus humanus corporis (human body louse) | NG                                               | NG   | NG   |      |
| MITES AND TICKS                               | Ixodes scapularis (black-legged tick)            | NG   | NG   | NG   |
| NEMATODES                                     | Caenorhabditis elegans (nematode)                | NG   | NG   | NG   |
|                                               | Caenorhabditis briggsae                          | NG   | NG   | NG   |
|                                               | Brugia malayi (filaria)                          | NG   | NG   | NG   |
|                                               | Loa loa (eye worm)                               | NG   | NG   | NG   |
|                                               | Trichinella spiralis                             | NG   | NG   | NG   |
| ANNELIDS                                      | Helobdella robusta                               | NG   | NG   | NG   |
| MOLLUSKS                                      | Lottia gigantea (owl limpet)                     | NG   | NG   | NG   |
|                                               | Crassostrea gigas (Pacific oyster)               | NG   | NG   | NG   |
| FLATWORMS                                     | Schistosoma mansoni                              | NG   | NG   | NG   |
| CNIDARIANS                                    | Nematostella vectensis (sea anemone)             | NG   | NG   | NG   |
|                                               | Hydra vulgaris                                   | NG   | NG   | NG   |
| PLACOZOANS                                    | Trichoplax adhaerens                             | NG   | NG   | NG   |
| PORIFERANS                                    | Amphimedon queenslandica (sponge)                | NG   | NG   | NG   |
|                                               |                                                  | HIGH | HIGH | HIGH |

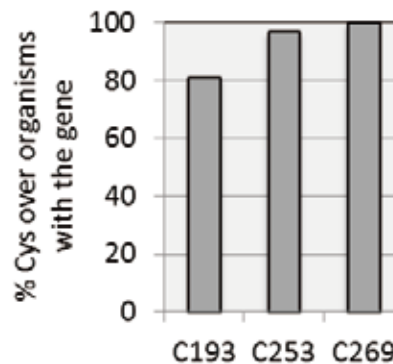

"NG" means there is no true ortholog (no gene) in that species

Figure S3





Table S1 - Differential deuterium exchange rates of identified SCGN peptides in HDX-MS experiment.

| Sequence              | Start | End | Domain       | Structure (Residue no.) | Differential deuterium exchange rate (%) |        |         |          |           | Mean   |
|-----------------------|-------|-----|--------------|-------------------------|------------------------------------------|--------|---------|----------|-----------|--------|
|                       |       |     |              |                         | 10 sec                                   | 60 sec | 300 sec | 1800 sec | 10800 sec |        |
| DSSREPTLGRL           | 2     | 12  | Domain I     |                         | 0.00                                     | 0.00   | 0.00    | 0.00     | 0.00      | 0.00   |
| DSSREPTLGRLDAAGF      | 2     | 17  |              |                         | 6.25                                     | 3.13   | 0.00    | 0.00     | 0.00      | 1.88   |
| WQVWQRFDADE           | 18    | 28  |              | EF 1 (25-36)            | 18.18                                    | 18.18  | 18.18   | 9.09     | 4.46      | 13.62  |
| WQVWQRFDADEKGYIEE     | 18    | 34  |              |                         | 17.65                                    | 11.76  | 17.65   | 0.00     | 0.00      | 9.41   |
| YIEEKELDAFF           | 31    | 41  |              |                         | 9.09                                     | 9.09   | 9.09    | 18.18    | 0.00      | 9.09   |
| FLHMLMKLGTDD          | 41    | 52  |              |                         | 0.00                                     | 0.00   | 0.00    | 0.00     | 0.00      | 0.00   |
| FLHMLMKLGTDDTVM       | 41    | 55  |              |                         | 0.00                                     | 0.00   | 0.00    | 0.00     | 0.00      | 0.00   |
| LMKLGTDVTVM           | 45    | 55  |              |                         | 0.00                                     | 0.00   | 0.00    | 0.00     | 0.00      | 0.00   |
| LMKLGTDVTVMKANL       | 45    | 59  |              |                         | 0.00                                     | 0.00   | 0.00    | 0.00     | 0.00      | 0.00   |
| KANLHKVKQQF           | 56    | 66  |              |                         | 9.09                                     | 0.00   | -9.09   | 0.00     | 0.00      | 0.00   |
| MTTQDASKDGRIRMKELAGMF | 67    | 87  | EF 2 (71-82) | 4.76                    | 7.14                                     | 4.76   | 4.76    | 4.76     | 5.24      |        |
| KELAGMF               | 81    | 87  |              | 14.29                   | 7.14                                     | 14.29  | 0.00    | 0.00     | 7.14      |        |
| LLFRRENPLDSSVEF       | 96    | 110 | Linker 1     | 10.00                   | 6.67                                     | 6.67   | 0.00    | 0.00     | 4.67      |        |
| LFRRENPLDSSVEF        | 97    | 110 |              | 3.57                    | 10.71                                    | 3.57   | 0.00    | 0.00     | 3.57      |        |
| FRRENPLDSSVEF         | 98    | 110 |              | 0.00                    | 0.00                                     | 0.00   | 0.00    | 0.00     | 0.00      |        |
| MQIWRKYDADSSG         | 111   | 123 | Domain II    | EF 3 (118-129)          | -7.69                                    | -3.85  | 0.00    | 0.00     | 0.00      | -2.31  |
| WRKYDADSSGF           | 114   | 124 |              |                         | -9.09                                    | -9.09  | 0.00    | 0.00     | -18.18    | -7.27  |
| ISAAELRNFLRD          | 125   | 136 |              |                         | 0.00                                     | 0.00   | 0.00    | 0.00     | 0.00      | 0.00   |
| AELRNFLRDLFHKKKAISE   | 128   | 147 |              | -2.50                   | -2.50                                    | -5.00  | 0.00    | -7.50    | -3.50     |        |
| LRNFLRDLFHKKKAISE     | 130   | 147 |              | -5.56                   | 0.00                                     | 0.00   | 0.00    | -2.78    | -1.67     |        |
| AKLEEYGTGM            | 148   | 157 |              | 0.00                    | -15.00                                   | -10.00 | -10.00  | 0.00     | -7.00     |        |
| EEYTGM                | 151   | 157 |              | EF 4 (162-173)          | -14.29                                   | 0.00   | 7.14    | -14.29   | 0.00      | -4.29  |
| MKIFDRNKDGRLDLNDL     | 158   | 174 |              |                         | 0.00                                     | 0.00   | 0.00    | -8.82    | -5.88     | -2.94  |
| DLNDLARILALQENF       | 170   | 184 |              |                         | 3.33                                     | 6.67   | 0.00    | 0.00     | 0.00      | 2.00   |
| ARILALQENFLL          | 175   | 186 |              |                         | -8.33                                    | -4.17  | 4.17    | 4.17     | 4.17      | 0.00   |
| QENFLLQFKMDACST       | 185   | 195 | Linker 2     | 9.09                    | 9.09                                     | 9.09   | 0.00    | 0.00     | 5.45      |        |
| EERKRDFEKIFA          | 196   | 207 | Domain III   | 0.00                    | 0.00                                     | -8.33  | 0.00    | 0.00     | -1.67     |        |
| AYYDVSKTGALEGPEVDG    | 207   | 224 |              | EF 5 (210-221)          | 0.00                                     | -5.56  | -16.67  | -5.56    | 0.00      | -5.56  |
| AYYDVSKTGALEGPEVDGF   | 207   | 225 |              |                         | -7.89                                    | -10.53 | -21.05  | -10.53   | 0.00      | -10.00 |
| YYDVSKTGALEGPEVDG     | 208   | 224 |              |                         | -5.88                                    | -5.88  | -17.65  | -5.88    | 0.00      | -7.06  |
| YDVSKTGALEGPEVDG      | 209   | 224 |              | -6.25                   | -6.25                                    | -18.75 | -6.25   | 0.00     | -7.50     |        |
| ELVQPSISGVDLDFK       | 231   | 245 |              |                         | -13.33                                   | 0.00   | 0.00    | 0.00     | 0.00      | -2.67  |
| ELVQPSISGVDLDFKREIL   | 231   | 249 |              |                         | -5.26                                    | 0.00   | -10.53  | -5.26    | 0.00      | -4.21  |
| LVQPSISGVDLDFK        | 232   | 245 |              |                         | -10.71                                   | 0.00   | -7.14   | 0.00     | 0.00      | -3.57  |
| PSISGVDLDFKREIL       | 235   | 249 |              |                         | -6.67                                    | 0.00   | -6.67   | -6.67    | -6.67     | -5.33  |
| LRHCDVNKDGKIQKSEL     | 250   | 266 |              | EF 6 (254-265)          | -11.76                                   | -11.76 | -17.65  | -17.65   | -11.76    | -14.12 |
| CLGLKIN               | 269   | 276 |              | 0.00                    | 12.50                                    | 0.00   | 0.00    | 0.00     | 2.50      |        |

Table S2 - Amino acids sequences of the six EF-hand loops of SCGN.  
 The amino acids with low occurrence (less than 5%) at each position in known EF-loops are underlined (Gifford, Walsh et al., 2007).

| EF-loop position   | 1                 | 2 | 3                   | 4        | 5                     | 6 | 7        | 8 | 9                                  | 10       | 11       | 12                  |
|--------------------|-------------------|---|---------------------|----------|-----------------------|---|----------|---|------------------------------------|----------|----------|---------------------|
|                    | <b>+X<br/>(D)</b> |   | <b>+Y<br/>(D,N)</b> |          | <b>+Z<br/>(D,S,N)</b> |   |          |   | <b>-X<br/>(D,S,T,E<br/>,N,G,Q)</b> |          |          | <b>-Z<br/>(E,D)</b> |
| EF1<br>(D25-E36)   | D                 | A | D                   | <u>E</u> | <u>K</u>              | G | Y        | I | E                                  | E        | K        | E                   |
| EF2<br>(D71-E82)   | D                 | A | <u>S</u>            | K        | D                     | G | R        | I | <u>R</u>                           | <u>M</u> | K        | E                   |
| EF3<br>(D118-E129) | D                 | A | D                   | <u>S</u> | S                     | G | F        | I | S                                  | A        | A        | E                   |
| EF4<br>(D162-D173) | D                 | R | N                   | K        | D                     | G | R        | L | D                                  | L        | N        | D                   |
| EF5<br>(D210-E221) | D                 | V | <u>S</u>            | K        | <u>I</u>              | G | <u>A</u> | L | E                                  | <u>G</u> | P        | E                   |
| EF6<br>(D254-E265) | D                 | V | N                   | K        | D                     | G | K        | I | Q                                  | K        | <u>S</u> | E                   |

A

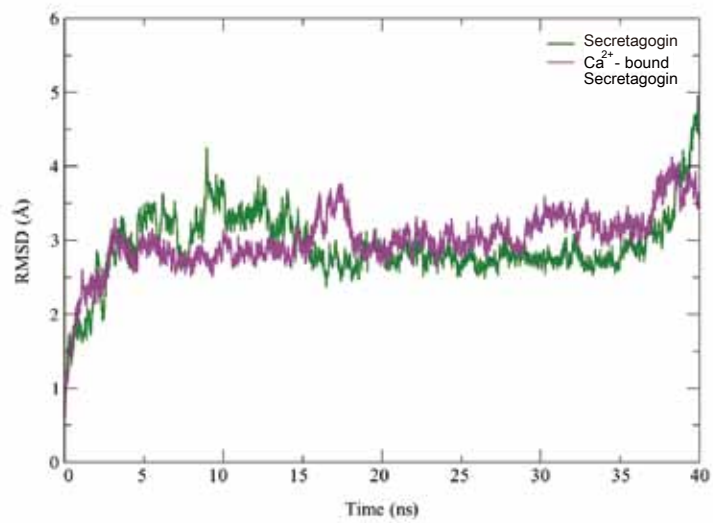

B

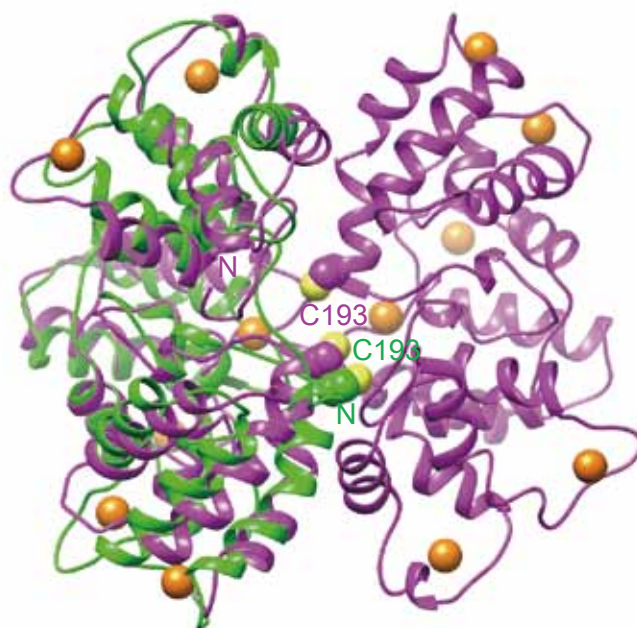

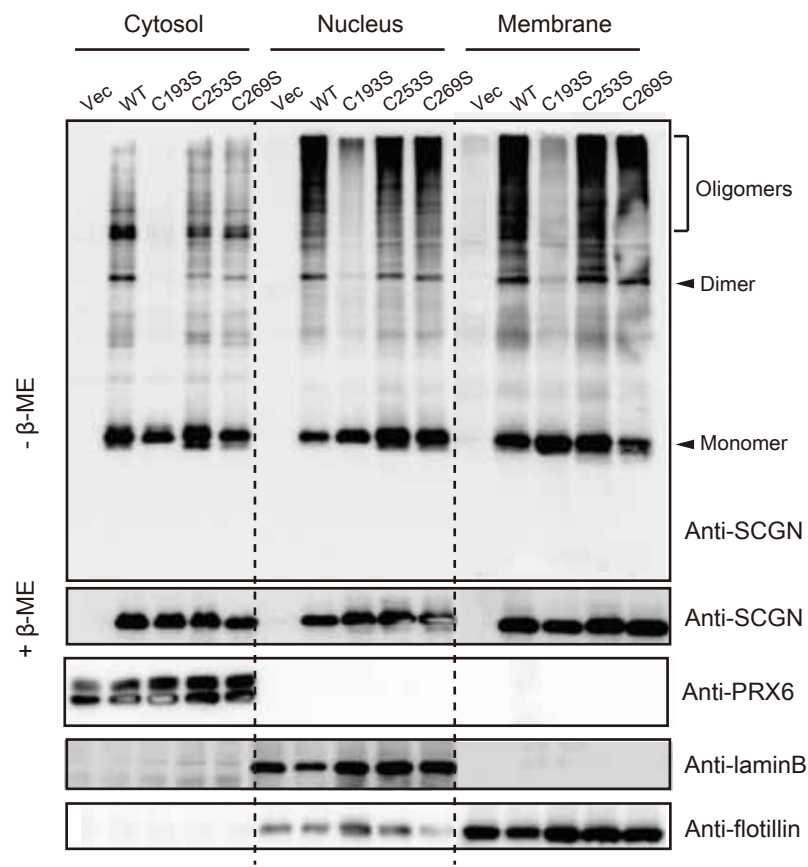

Figure S5

Figure 1A

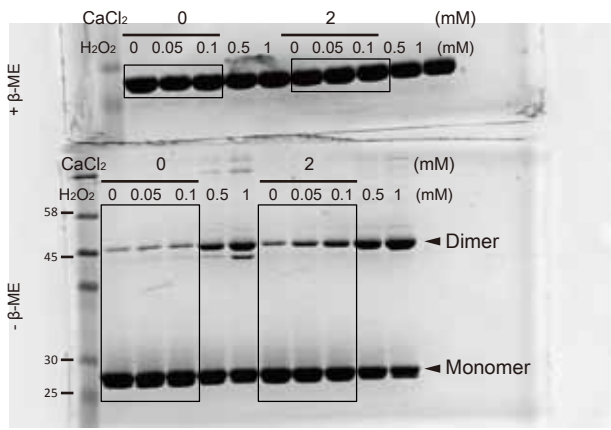

Figure 1B

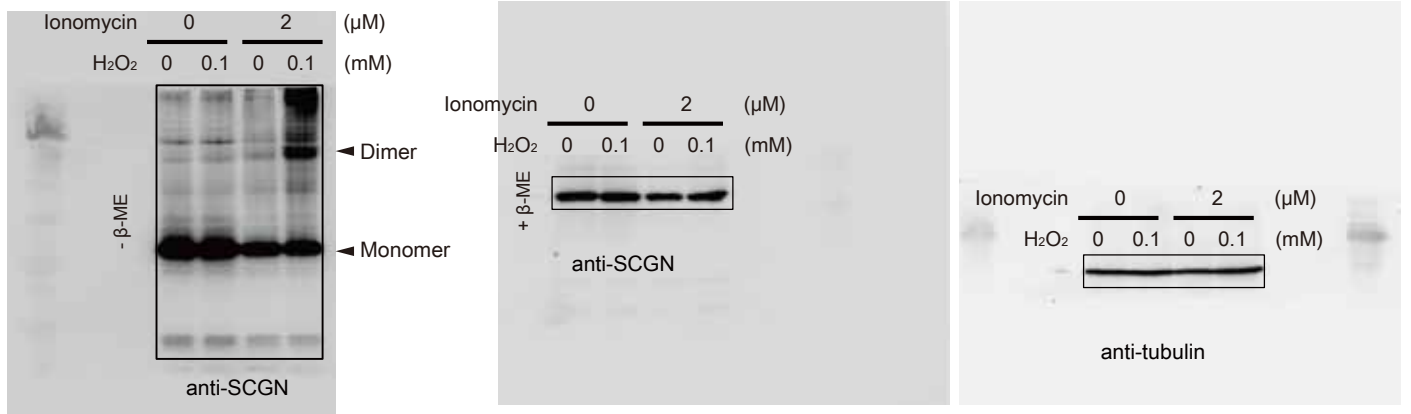

Figure 1D

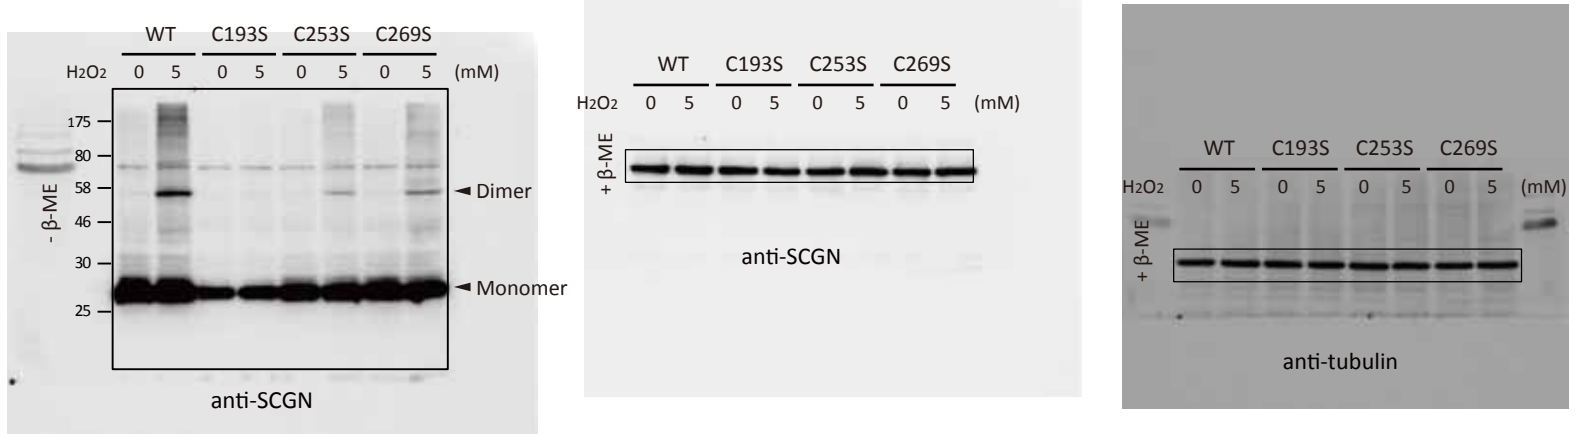

Figure 1E

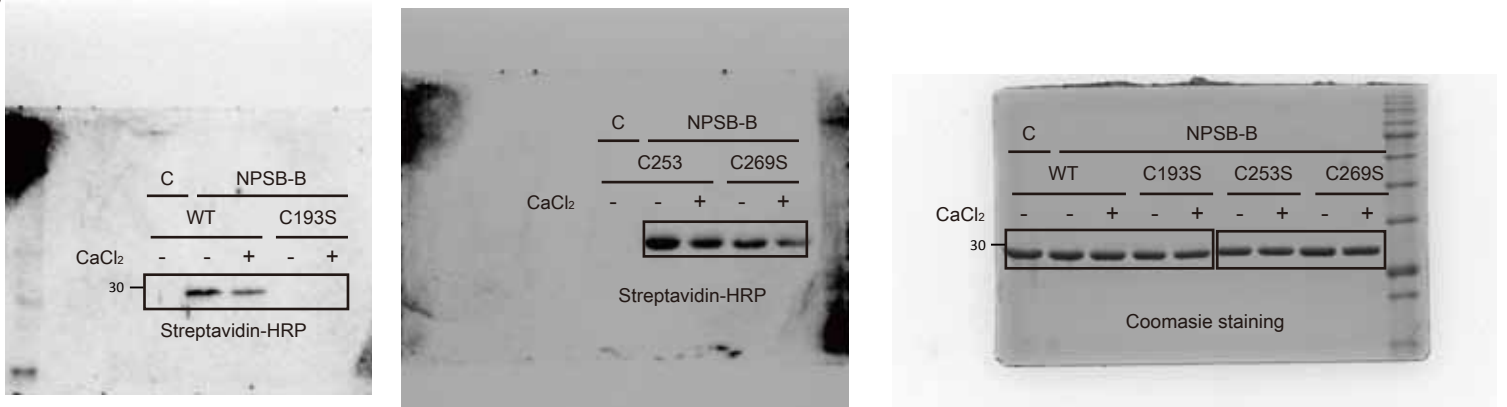

Figure S6

Figure 4A

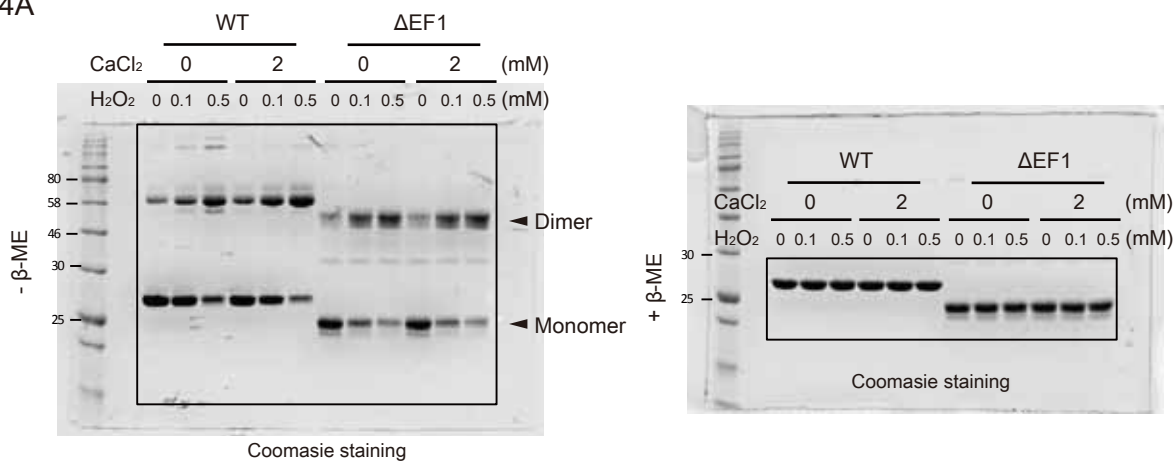

Figure 4B

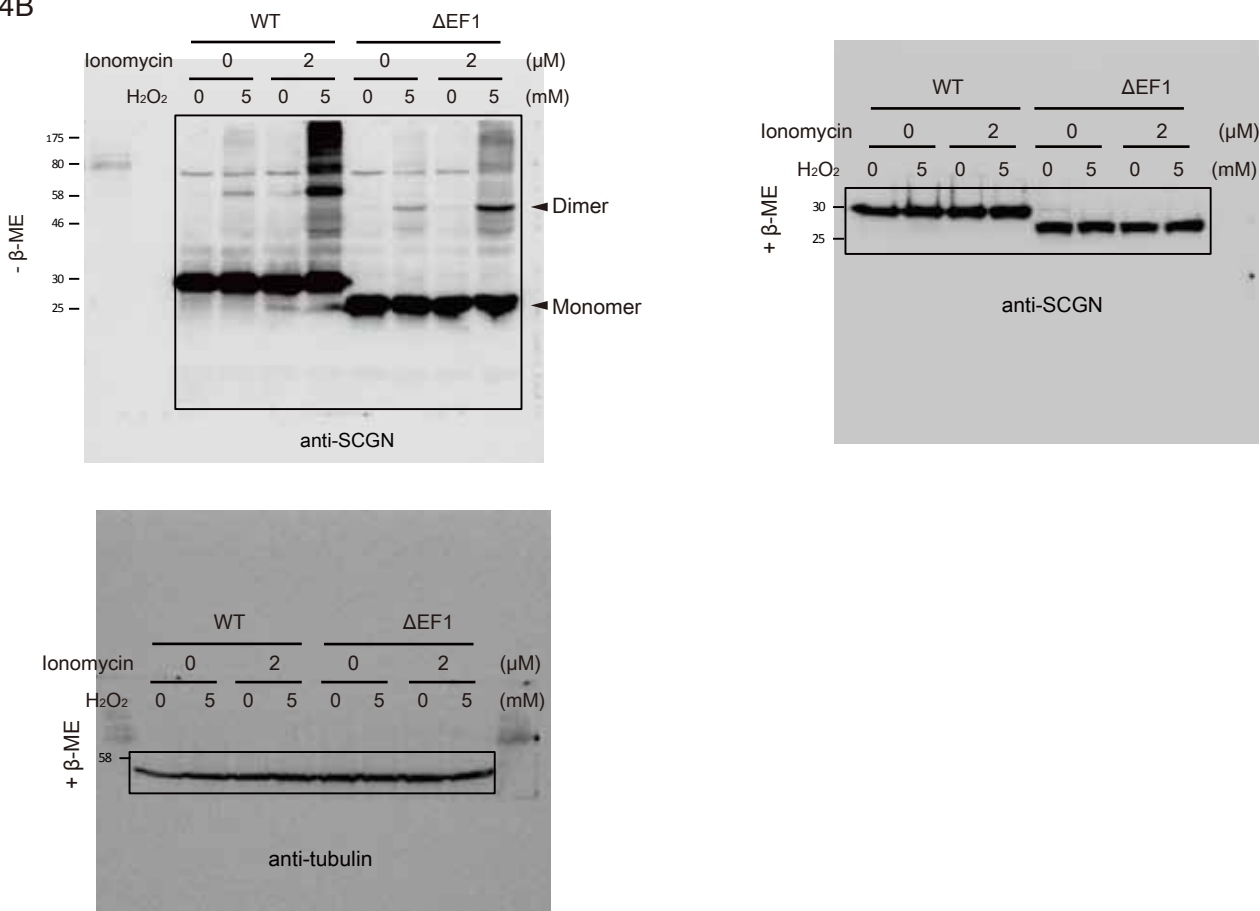

Figure 4C

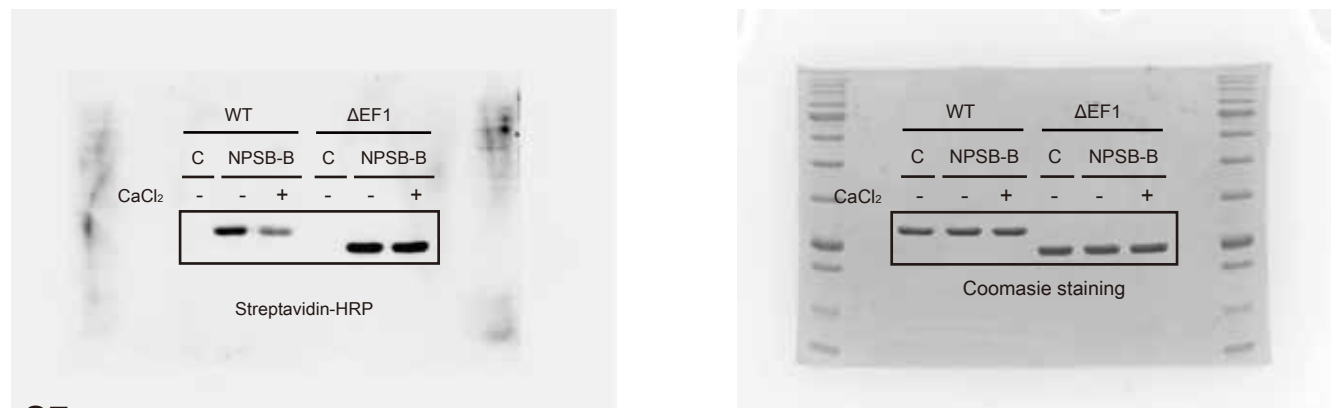

Figure S7

Figure 5A

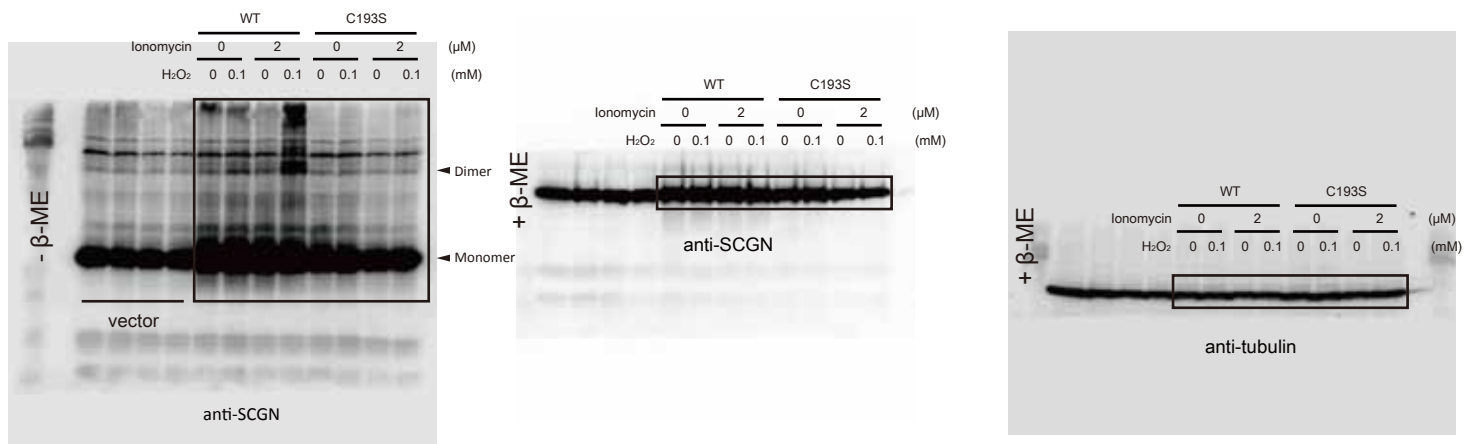

Figure 5B

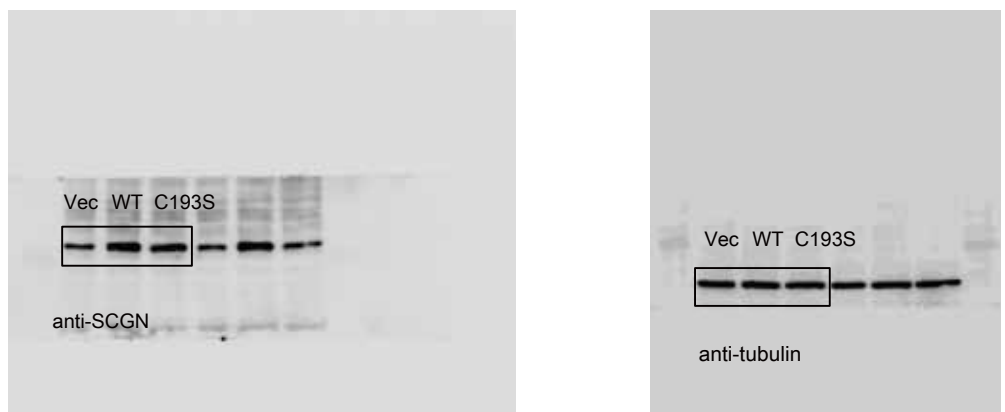

Figure 5C

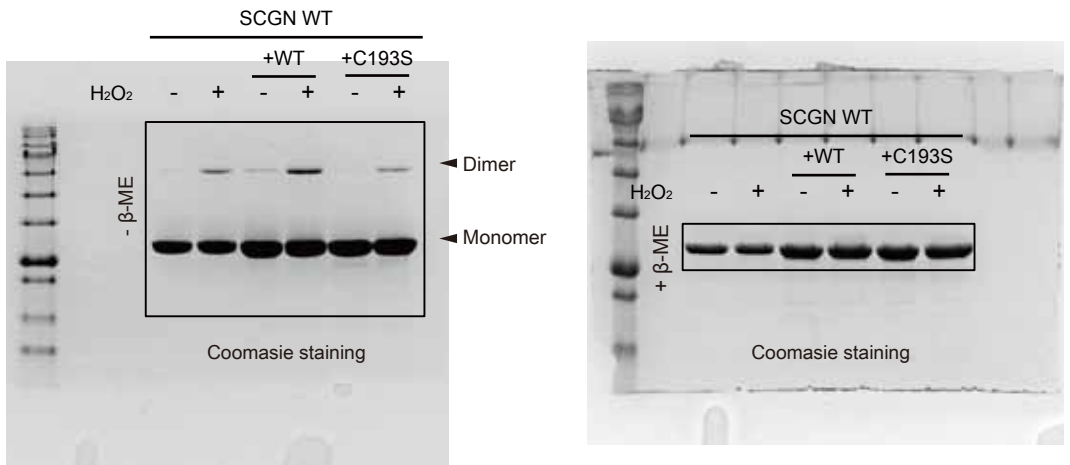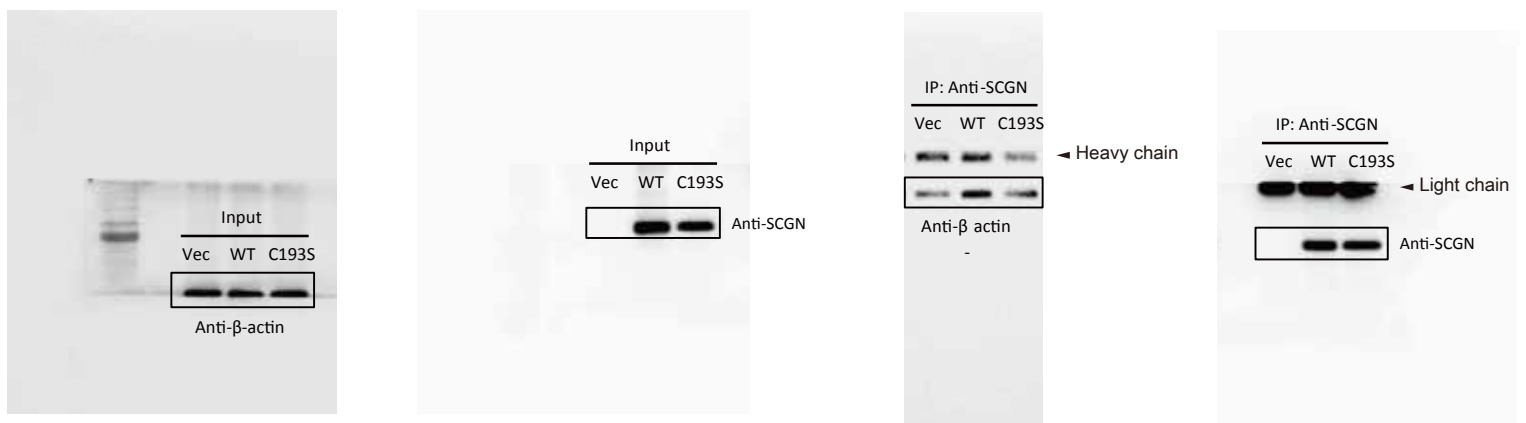

Figure S8
